# Supplementary material
Source: PubMed Central journal article supplement (PMC7825897)
Supplement: mmc1.pdf [file mmc1.pdf]

# THE LANCET

## **Supplementary appendix**

This appendix formed part of the original submission. We post it as supplied by the authors.

Supplement to: Hallal PC. SOS Brazil: science under attack. *Lancet* 2021; published online Jan 22. [http://dx.doi.org/10.1016/S0140-6736\(21\)00141-0](http://dx.doi.org/10.1016/S0140-6736(21)00141-0).

# SOS Brasil: ataques à ciência

*Pedro C Hallal - Universidade Federal de Pelotas*

Hallal PC. SOS Brazil: science under attack. Lancet 2021; [https://doi.org/10.1016/S0140-6736\(21\)00141-0](https://doi.org/10.1016/S0140-6736(21)00141-0).

Dados de 17 de janeiro de 2021 mostram que o Brasil é o segundo país com mais mortes por COVID-19 e o terceiro com mais casos ao redor do mundo. Como cientista, eu costumo não acreditar em coincidências. Em março de 2020, o Presidente Jair Bolsonaro se referiu a COVID-19 como uma “gripezinha”.<sup>1</sup> Em abril de 2020, ele declarou que havia sinais de que a pandemia estava acabando. Um mês depois, quando questionado por jornalistas sobre o aumento de casos de COVID-19 no Brasil, Bolsonaro respondeu “E daí? O que queres que eu faça?”<sup>2</sup>. Em resposta, os Editores<sup>3</sup> sugeririam que “talvez a maior ameaça ao enfrentamento da COVID-19 no Brasil seja seu Presidente, Jair Bolsonaro”. Mais recentemente, Bolsonaro foi, que tenha chegado ao meu conhecimento, o único chefe de estado do mundo a dizer que não tomará vacina. Ele inclusive desestimulou a população a se vacinar, ao dizer: “Se você virar um jacaré, é problema seu”.<sup>4</sup>

Embora essas manifestações sejam ultrajantes, a resposta brasileira à pandemia é ainda pior. As taxas de testagem estão muito abaixo da média mundial.<sup>5</sup> Não há políticas de rastreamento de contatos implementadas. O distanciamento social tem sido desacreditado. Em 4 semanas, o Brasil teve três ministros da saúde. Apesar de cientistas e institutos de pesquisa brasileiros, como o Butantan e a Fiocruz, estarem fortemente envolvidos na corrida global pela vacina, a quantidade de seringas e agulhas era insuficiente para começar a campanha de vacinação.<sup>6</sup>

Desde o início do mandato de Bolsonaro em 2019, a ciência vem sendo atacada com cortes de verbas e negacionismo. O Diretor do Instituto Nacional de Pesquisas Espaciais, Ricardo Galvão, foi exonerado do cargo após apresentar e comentar dados sobre desmatamento. Os ex-ministros da saúde, Luiz Henrique Mandetta e Nelson Teich discordaram publicamente de Bolsonaro ao defenderem as recomendações da ciência para o enfrentamento da COVID-19. Eu nunca imaginei que seria o próximo.

Sou o investigador principal do EPICOVID-19, o maior estudo epidemiológico sobre COVID-19 no Brasil. Nas três primeiras fases desse estudo nacional, nós encontramos marcantes desigualdades regionais, étnicas e socioeconômicas na pandemia de COVID-19 no Brasil, além de uma diferença de seis vezes entre os dados oficiais e a estimativa do número real de pessoas infectadas.<sup>7</sup> Esses resultados não foram bem recebidos pelo ministério da saúde, e o financiamento para a pesquisa foi descontinuado em julho de 2020. Felizmente, o EPICOVID-19 obteve financiamento de outras instituições e continuou a fornecer informações sobre a magnitude da pandemia de COVID-19 no Brasil.

Em 2020, eu fui convocado para ir a Brasília três vezes, para reuniões com o ministério da saúde. Quatro dias após a minha última visita à Brasília, em dezembro de 2020, comecei a apresentar sintomas de COVID-19. Minha infecção com o vírus SARS-CoV-2 foi revelada ao público pela mídia, e fui acusado de hipocrisia e da atitude “faça o que eu digo, mas não faça o que eu faço”.<sup>8</sup> No dia 11 de janeiro, durante uma entrevista de rádio, fui criticado por um deputado e por um jornalista: a razão sendo que se eu fui infectado pelo vírus SARS-CoV-2, isso significaria que eu não segui as recomendações que eu mesmo dissemino. No dia 14 de janeiro de 2021, Bolsonaro twittou<sup>9</sup> o link para o trecho específico da entrevista no rádio no qual minha doença é mencionada.

Coincidentemente ou não, o ataque de Bolsonaro aconteceu exatamente no momento mais dramático da pandemia no Brasil. Manaus, na região Amazônica, está vivendo um caos, com falta de oxigênio. O ministro da saúde voou para Manaus e, depois de uma visita de três dias, anunciou que a cidade receberia cloroquina, ivermectina e outros medicamentos para enfrentar a situação. Ao mesmo tempo, políticos, empresários e outros apoiadores de Bolsonaro lutavam contra um anunciado (e urgentemente necessário) lockdown em Manaus. Inacreditavelmente, no dia 16 de janeiro de 2021, uma publicação do ministério da saúde do Brasil foi sinalizada pelo Twitter como violando suas regras de publicação por meio da disseminação de notícias enganosas e potencialmente prejudiciais relacionadas à COVID-19.

A resposta trágica do Brasil à COVID-19 tem um preço. A população brasileira representa 2,7% da população mundial. Se o Brasil também representasse 2,7% das mortes por

COVID-19 (isto é, tivesse uma performance no enfrentamento da COVID-19 igual a média mundial), 56 311 pessoas teriam morrido. Contudo, até o dia 21 de janeiro de 2021, 212 893 pessoas haviam falecido devido à COVID-19 no país. Em outras palavras, 156 582 vidas foram perdidas por causa do mau desempenho brasileiro no enfrentamento da pandemia. Atacar pesquisadores definitivamente não vai ajudar a resolver o problema.

## Referências

<sup>1</sup> BBC. 2 momentos em que Bolsonaro chamou covid-19 de ‘gripezinha’, o que agora nega. Nov 27, 2020. <https://www.bbc.com/portuguese/brasil-55107536> (acessado em 18 de janeiro de 2021).

<sup>2</sup> Garcia G, Henrique Gomes P, Viana H. ‘E daí? Lamento. Quer que eu faça o quê?’, diz Bolsonaro sobre mortes por coronavírus; ‘Sou Messias, mas não faço milagre’. April 28, 2020. <https://g1.globo.com/politica/noticia/2020/04/28/e-dai-lamento-quer-que-eu-faca-o-que-dizbolsonaro-sobre-mortes-por-coronavirus-nobrasil.ghtml> (acessado em 18 de janeiro de 2021).

<sup>3</sup> The Lancet. COVID-19 in Brazil: so what? Lancet 2020; 395: 1461.

<sup>4</sup> AFP. Brazil’s Bolsonaro warns virus vaccine can turn people into ‘crocodiles’. Dec 18, 2020. <https://www.france24.com/en/livenews/20201218-brazil-s-bolsonaro-warnsvirus-vaccine-can-turn-people-into-crocodile> (acessado em 18 de janeiro de 2021).

<sup>5</sup> Hasell J, Mathieu E, Beltekian D et al. A crosscountry database of COVID-19 testing. Sci Data 2020; 7: 345.

<sup>6</sup> Jornal Nacional. Brasil pode não ter agulhas e seringas suficientes para vacinar contra Covid, alerta conselho. Dec 30, 2020. <https://g1.globo.com/jornal-nacional/noticia/2020/12/30/brasil-pode-nao-ter-agulhas-e-seringassuficientes-para-vacinar-contracovid-alertaconselho.ghtml> (acessado em 18 de janeiro de 2021).

<sup>7</sup> Hallal PC, Hartwig FP, Horta BL, et al. SARSCoV-2 antibody prevalence in Brazil: results from two successive nationwide serological household surveys. *Lancet Glob Health* 2020; 8:e1390–e98.

<sup>8</sup> Vasconcellos H. Deputado critica ex-reitor que contraiu covid-19: ‘Moral de cuecas’. Jan 14, 2021. <https://noticias.uol.com.br/politica/ultimas-noticias/2021/01/14/deputado-critica-ex-reitor-que-contraiucovid-19-moral-de-cuecas.htm> (acessado em 21 de janeiro de 2021).

<sup>9</sup> @jairbolsonaro. Jan 14, 2021. <https://twitter.com/jairbolsonaro/status/1349659482251526152>. (acessado em 18 de janeiro de 2021).
